# Supplementary material
Source: Springer Nature journal article supplement (https://www.springermedizin.de/resource/supplementary/12955_2013_1417_MOESM1_ESM.pdf/9559462)
Supplement: MOESM1 [file 9559462]

## **1. Conceptual and item equivalences**

**Focus group discussion to get Brazilian pediatric dentists' thoughts and feelings about the English version of DDQ**

## **2. Semantic equivalence**

**Translation to Brazilian Portuguese language and back-translation to English language to obtain 3 independent versions**

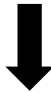

**Evaluation of the three-set Brazilian Portuguese-English versions by an expert panel to produce a consensus DDQ version in Brazilian Portuguese**

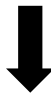

**Back-translation of the consensus DDQ version to English language to be evaluated by the author of the original DDQ, to certify that a preliminary adapted DDQ version was obtained**

## **3. Operational equivalence**

**Pre-testing of the preliminary adapted DDQ version to 30 preschoolers' mothers**

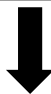

**Final revision by an expert committee meeting to introduce the cross-culturally adapted version of DDQ**
